# Supplementary material for: Analysis of Microbial Communities in Membrane Biofilm Reactors Using a High-Density Microarray
Source: MDPI journal article supplement (doi:10.3390/membranes13030324), 2023-03-11
Supplement: s1 [file s1]

**Table S1.** Average fluorescence intensity of the 20 dominant bacteria in the MBfR (30 days).

| <i>class_tax</i>           | <i>order_tax</i>        | <i>family_tax</i>        | <i>rep_prokMSAname</i>                                            | <i>Average fluorescence intensity</i> |
|----------------------------|-------------------------|--------------------------|-------------------------------------------------------------------|---------------------------------------|
| <i>Gammaproteobacteria</i> | <i>Xanthomonadales</i>  | <i>Xanthomonadaceae</i>  | <i>Dyemonas todaii</i> str. XD10                                  | 6743                                  |
| <i>Betaproteobacteria</i>  | <i>Nitrosomonadales</i> | <i>Nitrosomonadaceae</i> |                                                                   | 5819                                  |
| <i>Gammaproteobacteria</i> | <i>Legionellales</i>    | <i>Unclassified</i>      | <i>uranium mining waste pile clone JG37-AG-14 proteobacterium</i> | 5730                                  |
| <i>Betaproteobacteria</i>  | <i>Burkholderiales</i>  | <i>Comamonadaceae</i>    | <i>Hydrogenophaga taeniospiralis</i> str. ATCC 49743              | 5552                                  |
| <i>Alphaproteobacteria</i> | <i>Sphingomonadales</i> | <i>Sphingomonadaceae</i> | <i>Sphingopyxis flavimaris</i> str. SW-151                        | 5519                                  |
| <i>Betaproteobacteria</i>  | <i>Burkholderiales</i>  | <i>Comamonadaceae</i>    | <i>Variovorax paradoxus</i> TG27                                  | 5437                                  |
| <i>Betaproteobacteria</i>  | <i>Burkholderiales</i>  | <i>Comamonadaceae</i>    | <i>Comamonas testosteroni</i> str. SMCC B329                      | 5419                                  |
| <i>Betaproteobacteria</i>  | <i>Burkholderiales</i>  | <i>Oxalobacteraceae</i>  | <i>Massilia timonae timone</i>                                    | 5353                                  |
| <i>Betaproteobacteria</i>  | <i>Burkholderiales</i>  | <i>Comamonadaceae</i>    | <i>travertine hot spring clone SM1E01</i>                         | 5352                                  |
| <i>Gammaproteobacteria</i> | <i>Xanthomonadales</i>  | <i>Xanthomonadaceae</i>  | <i>Waste-gas biofilter clone BIyi3</i>                            | 5331                                  |
| <i>Betaproteobacteria</i>  | <i>Burkholderiales</i>  | <i>Comamonadaceae</i>    | <i>Lampropedia hyalina</i> str. DSM 15336                         | 5183                                  |
| <i>Betaproteobacteria</i>  | <i>Burkholderiales</i>  | <i>Comamonadaceae</i>    | <i>Aquaspirillum metamorphum</i> str. DSM 1837                    | 5127                                  |
| <i>Betaproteobacteria</i>  | <i>Burkholderiales</i>  | <i>Comamonadaceae</i>    | <i>Acidovorax facilis</i> str. CCUG 2113                          | 5123                                  |
| <i>Betaproteobacteria</i>  | <i>Burkholderiales</i>  | <i>Comamonadaceae</i>    | <i>naphthalene-contaminated sediment clone 76</i>                 | 4945                                  |
| <i>Betaproteobacteria</i>  | <i>Burkholderiales</i>  | <i>Comamonadaceae</i>    | <i>strain isolate str. rJ10</i>                                   | 4923                                  |
| <i>Betaproteobacteria</i>  | <i>Burkholderiales</i>  | <i>Comamonadaceae</i>    | <i>hydrocarbon-degrading consortium clone AF1-8</i>               | 4906                                  |
| <i>Betaproteobacteria</i>  | <i>Burkholderiales</i>  | <i>Comamonadaceae</i>    | <i>Delftia tsuruhatensis</i> str. AD9                             | 4855                                  |
| <i>Betaproteobacteria</i>  | <i>Burkholderiales</i>  | <i>Comamonadaceae</i>    | <i>strain isolate str. rM4</i>                                    | 4849                                  |
| <i>Betaproteobacteria</i>  | <i>Burkholderiales</i>  | <i>Comamonadaceae</i>    | <i>Acidovorax defluvii</i> str. BSB411                            | 4846                                  |
| <i>Alphaproteobacteria</i> | <i>Rickettsiales</i>    | <i>Unclassified</i>      | <i>termite gut homogenate clone Rs-M62 proteobacterium</i>        | 4820                                  |

**Table S2.** Average fluorescence intensity of the 20 dominant bacteria in the MBfR (60 days).

| phylum_tax     | class_tax           | order_tax         | family_tax                       | rep_prokMSAname                                               | Average fluorescence intensity |
|----------------|---------------------|-------------------|----------------------------------|---------------------------------------------------------------|--------------------------------|
| Proteobacteria | Gammaproteobacteria | Xanthomonadales   | Xanthomonadaceae                 | <i>Dyemonas todaii</i> str. XD10                              | 3789                           |
| Firmicutes     | Clostridia          | Unclassified      | Unclassified                     |                                                               | 3756                           |
| Proteobacteria | Alphaproteobacteria | Bradyrhizobiales  | Beijerinck/Rhodoplan/Methylocyst | <i>Beijerinckia indica</i>                                    | 3658                           |
| Proteobacteria | Gammaproteobacteria | Legionellales     | Unclassified                     | uranium mining waste pile clone JG37-AG-14<br>proteobacterium | 3561                           |
| Proteobacteria | Alphaproteobacteria | Rhodobacterales   | Rhodobacteraceae                 | <i>Rhodobacter sphaeroides</i> str. 2.4.1                     | 3553                           |
| Proteobacteria | Alphaproteobacteria | Rhizobiales       | Phyllobacteriaceae               |                                                               | 3491                           |
| Firmicutes     | Clostridia          | Clostridiales     | Peptococc/Acidaminococc          | anoxic bulk soil flooded rice microcosm clone BSV43<br>clone  | 3481                           |
| Acidobacteria  | Acidobacteria       | Acidobacteriales  | Acidobacteriaceae                |                                                               | 3464                           |
| Proteobacteria | Gammaproteobacteria | Methylococcales   | Unclassified                     | <i>Methylobacter marinus</i> str. A45                         | 3443                           |
| Firmicutes     | Clostridia          | Clostridiales     | Lachnospiraceae                  | termite gut homogenate clone Rs-Q18 bacterium                 | 3372                           |
| Proteobacteria | Gammaproteobacteria | Symbionts         | Unclassified                     | <i>Seepiophila jonesi</i> symbiont                            | 3343                           |
| Proteobacteria | Betaproteobacteria  | Burkholderiales   | Oxalobacteraceae                 | <i>Paucimonas lemoignei</i> str. ATCC 17989T                  | 3340                           |
| Chloroflexi    | Anaerolineae        | Unclassified      | Unclassified                     | DCP-dechlorinating consortium clone SHA-36                    | 3332                           |
| Proteobacteria | Alphaproteobacteria | Bradyrhizobiales  | Hyphomicrobiaceae                | <i>Hyphomicrobium aestuarii</i> str. DSM 1564                 | 3328                           |
| Firmicutes     | Clostridia          | Clostridiales     | Clostridiaceae                   | <i>Clostridium acetobutylicum</i> str. ATCC 824               | 3308                           |
| Proteobacteria | Alphaproteobacteria | Caulobacterales   | Caulobacteraceae                 | <i>Brevundimonas diminuta</i> str. IAM 12691T                 | 3280                           |
| Proteobacteria | Alphaproteobacteria | Bradyrhizobiales  | Methylobacteriaceae              | <i>Methylobacterium thiocyanatum</i> str. ALL/SCN-P           | 3269                           |
| Proteobacteria | Alphaproteobacteria | Rhizobiales       | Unclassified                     |                                                               | 3249                           |
| Proteobacteria | Gammaproteobacteria | Unclassified      | Unclassified                     |                                                               | 3245                           |
| Firmicutes     | Mollicutes          | Anaeroplasmatales | Erysipelotrichaceae              |                                                               | 3238                           |
